# Supplementary material for: Revised method for preparation of simulated body fluid for assessment of the apatite-forming ability of bioactive materials: proposal of mixing two stock solutions
Source: Royal Society of Chemistry journal article supplement (doi:10.1039/d4ra07739c), 2024-01-01
Supplement: d4ra07739c1.pdf [file d4ra07739c1.pdf]

Electronic supplementary information #1

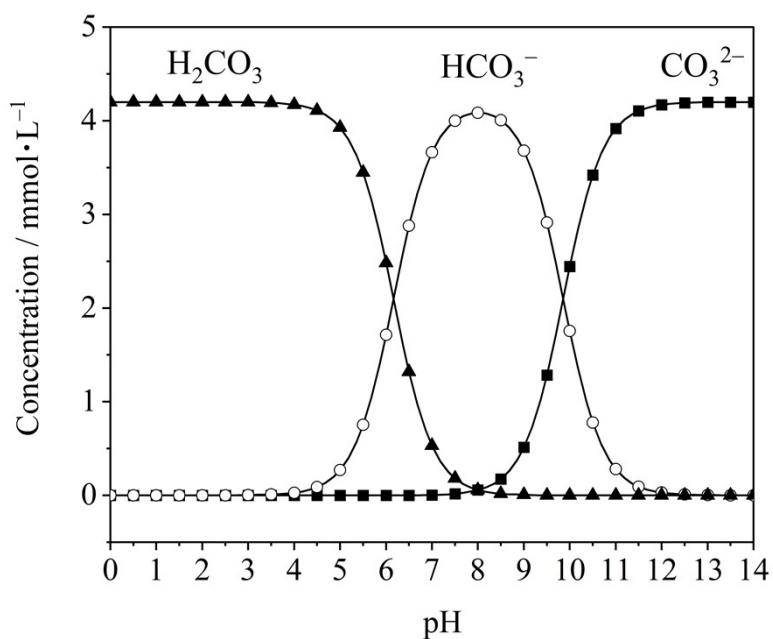

**Figure S1** Relative amounts of carbonic acid species on varied pH in aqueous solution kept at 37 °C and standard atmospheric pressure (1 atm). The values are obtained by calculation, assumed total carbonic species would be 4.2 mM at ionic strength  $\mu= 0.15$  (nominal concentration in SBF).

## Electronic supplementary information #2

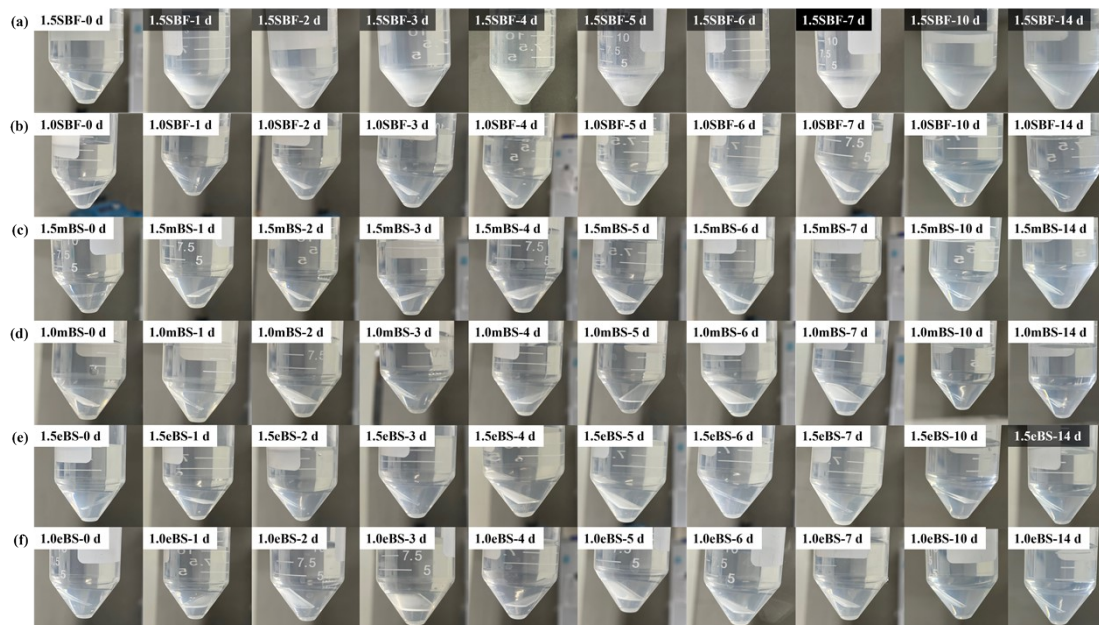

**Figure S2** All the appearance on change of the solutions in a polypropylene tube containing slide glass after being kept at 37 °C for various periods up to 14 d.
